# Supplementary material for: Proteolytic cleavage and inactivation of the TRMT1 tRNA modification enzyme by SARS-CoV-2 main protease
Source: eLife. 2024 May 30;12:RP90316. doi: 10.7554/eLife.90316 (PMC11139479; doi:10.7554/eLife.90316)
Supplement: Figure 1—figure supplement 1—source data 1. [file elife-90316-fig1-figsupp1-data1.xls]

## Sheet: m7G
Component Name		Curve Index	Weighting Index	Origin Index	Equation
m7G					N/A
							Specified	Calculated
Filename	Sample Type	Sample Name	Integ. Type	Area	ISTD Area	Area	Amount	Amount	%Diff	%RSD-AMT	Peak Status	Level	Units	RT	Sample ID
blank1	Blank Sample		Method Settings	NF	NA	NF	NA	NF	NF	NF	Not Found	NA		NF	1
blank2	Blank Sample		Method Settings	NF	NA	NF	NA	NF	NF	NF	Not Found	NA		NF	1
blank3	Blank Sample		Method Settings	NF	NA	NF	NA	NF	NF	NF	Not Found	NA		NF	1
blank4	Blank Sample		Method Settings	NF	NA	NF	NA	NF	NF	NF	Not Found	NA		NF	1
blank5	Blank Sample		Method Settings	NF	NA	NF	NA	NF	NF	NF	Not Found	NA		NF	1
01	Unknown Sample		Method Settings	950814	NA	NA	NA	NA	NA	NA	Response Low	NA		1.23961	1
02	Unknown Sample		Method Settings	1.04454e+06	NA	NA	NA	NA	NA	NA	Response Low	NA		1.23731	1
03	Unknown Sample		Method Settings	1.14525e+06	NA	NA	NA	NA	NA	NA	Response Low	NA		1.23004	1
04	Unknown Sample		Method Settings	905063	NA	NA	NA	NA	NA	NA	Response Low	NA		1.23608	1
05	Unknown Sample		Method Settings	1.02121e+06	NA	NA	NA	NA	NA	NA	Response Low	NA		1.23536	1
06	Unknown Sample		Method Settings	948433	NA	NA	NA	NA	NA	NA	Response Low	NA		1.2325	1
07	Unknown Sample		Method Settings	795909	NA	NA	NA	NA	NA	NA	Response Low	NA		1.23522	1
08	Unknown Sample		Method Settings	767782	NA	NA	NA	NA	NA	NA	Response Low	NA		1.23618	1
09	Unknown Sample		Method Settings	805157	NA	NA	NA	NA	NA	NA	Response Low	NA		1.23616	1
10	Unknown Sample		Method Settings	811996	NA	NA	NA	NA	NA	NA	Response Low	NA		1.22227	1
11	Unknown Sample		Method Settings	814809	NA	NA	NA	NA	NA	NA	Response Low	NA		1.22855	1
12	Unknown Sample		Method Settings	940412	NA	NA	NA	NA	NA	NA	Response Low	NA		1.23525	1
13	Unknown Sample		Method Settings	986807	NA	NA	NA	NA	NA	NA	Response Low	NA		1.23228	1
14	Unknown Sample		Method Settings	1.07881e+06	NA	NA	NA	NA	NA	NA	Response Low	NA		1.23259	1
15	Unknown Sample		Method Settings	1.14838e+06	NA	NA	NA	NA	NA	NA	Response Low	NA		1.23376	1
16	Unknown Sample		Method Settings	988210	NA	NA	NA	NA	NA	NA	Response Low	NA		1.23201	1
17	Unknown Sample		Method Settings	1.18085e+06	NA	NA	NA	NA	NA	NA	Response Low	NA		1.23144	1
18	Unknown Sample		Method Settings	1.13689e+06	NA	NA	NA	NA	NA	NA	Response Low	NA		1.23273	1
19	Unknown Sample		Method Settings	974466	NA	NA	NA	NA	NA	NA	Response Low	NA		1.23506	1
20	Unknown Sample		Method Settings	1.04274e+06	NA	NA	NA	NA	NA	NA	Response Low	NA		1.23278	1
21	Unknown Sample		Method Settings	1.00856e+06	NA	NA	NA	NA	NA	NA	Response Low	NA		1.23242	1
22	Unknown Sample		Method Settings	976335	NA	NA	NA	NA	NA	NA	Response Low	NA		1.23228	1
23	Unknown Sample		Method Settings	1.00504e+06	NA	NA	NA	NA	NA	NA	Response Low	NA		1.23122	1
24	Unknown Sample		Method Settings	964083	NA	NA	NA	NA	NA	NA	Response Low	NA		1.23286	1
25	Unknown Sample		Method Settings	971743	NA	NA	NA	NA	NA	NA	Response Low	NA		1.2319	1
26	Unknown Sample		Method Settings	976517	NA	NA	NA	NA	NA	NA	Response Low	NA		1.2323	1
27	Unknown Sample		Method Settings	841633	NA	NA	NA	NA	NA	NA	Response Low	NA		1.23388	1
28	Unknown Sample		Method Settings	672873	NA	NA	NA	NA	NA	NA	Response Low	NA		1.2297	1
29	Unknown Sample		Method Settings	680421	NA	NA	NA	NA	NA	NA	Response Low	NA		1.22944	1
30	Unknown Sample		Method Settings	690147	NA	NA	NA	NA	NA	NA	Response Low	NA		1.22941	1
Created By:
User Name		Full Name		Date
kwelle		Welle, Kevin		6/17/2022 7:54:22 PM

## Sheet: C
Component Name		Curve Index	Weighting Index	Origin Index	Equation
C					N/A
							Specified	Calculated
Filename	Sample Type	Sample Name	Integ. Type	Area	ISTD Area	Area	Amount	Amount	%Diff	%RSD-AMT	Peak Status	Level	Units	RT	Sample ID
blank1	Blank Sample		Method Settings	NF	NA	NF	NA	NF	NF	NF	Not Found	NA		NF	1
blank2	Blank Sample		Method Settings	NF	NA	NF	NA	NF	NF	NF	Not Found	NA		NF	1
blank3	Blank Sample		Method Settings	NF	NA	NF	NA	NF	NF	NF	Not Found	NA		NF	1
blank4	Blank Sample		Method Settings	NF	NA	NF	NA	NF	NF	NF	Not Found	NA		NF	1
blank5	Blank Sample		Method Settings	NF	NA	NF	NA	NF	NF	NF	Not Found	NA		NF	1
01	Unknown Sample		Method Settings	5.11212e+06	NA	NA	NA	NA	NA	NA	Response Low	NA		1.40611	1
02	Unknown Sample		Method Settings	6.94348e+06	NA	NA	NA	NA	NA	NA	Response Low	NA		1.40381	1
03	Unknown Sample		Method Settings	6.66828e+06	NA	NA	NA	NA	NA	NA	Response Low	NA		1.40381	1
04	Unknown Sample		Method Settings	6.13465e+06	NA	NA	NA	NA	NA	NA	Response Low	NA		1.40256	1
05	Unknown Sample		Method Settings	6.46482e+06	NA	NA	NA	NA	NA	NA	Response Low	NA		1.40006	1
06	Unknown Sample		Method Settings	6.52605e+06	NA	NA	NA	NA	NA	NA	Response Low	NA		1.40623	1
07	Unknown Sample		Method Settings	4.92507e+06	NA	NA	NA	NA	NA	NA	Response Low	NA		1.39996	1
08	Unknown Sample		Method Settings	4.645e+06	NA	NA	NA	NA	NA	NA	Response Low	NA		1.4027	1
09	Unknown Sample		Method Settings	5.42228e+06	NA	NA	NA	NA	NA	NA	Response Low	NA		1.40266	1
10	Unknown Sample		Method Settings	5.09323e+06	NA	NA	NA	NA	NA	NA	Response Low	NA		1.3779	1
11	Unknown Sample		Method Settings	5.39537e+06	NA	NA	NA	NA	NA	NA	Response Low	NA		1.40049	1
12	Unknown Sample		Method Settings	5.66273e+06	NA	NA	NA	NA	NA	NA	Response Low	NA		1.39994	1
13	Unknown Sample		Method Settings	6.07102e+06	NA	NA	NA	NA	NA	NA	Response Low	NA		1.39335	1
14	Unknown Sample		Method Settings	6.48559e+06	NA	NA	NA	NA	NA	NA	Response Low	NA		1.39363	1
15	Unknown Sample		Method Settings	7.31695e+06	NA	NA	NA	NA	NA	NA	Response Low	NA		1.39483	1
16	Unknown Sample		Method Settings	6.30123e+06	NA	NA	NA	NA	NA	NA	Response Low	NA		1.39308	1
17	Unknown Sample		Method Settings	7.68223e+06	NA	NA	NA	NA	NA	NA	Response Low	NA		1.39249	1
18	Unknown Sample		Method Settings	8.14276e+06	NA	NA	NA	NA	NA	NA	Response Low	NA		1.39382	1
19	Unknown Sample		Method Settings	5.67315e+06	NA	NA	NA	NA	NA	NA	Response Low	NA		1.39612	1
20	Unknown Sample		Method Settings	6.40384e+06	NA	NA	NA	NA	NA	NA	Response Low	NA		1.39386	1
21	Unknown Sample		Method Settings	6.39058e+06	NA	NA	NA	NA	NA	NA	Response Low	NA		1.3935	1
22	Unknown Sample		Method Settings	6.25599e+06	NA	NA	NA	NA	NA	NA	Response Low	NA		1.39334	1
23	Unknown Sample		Method Settings	6.40554e+06	NA	NA	NA	NA	NA	NA	Response Low	NA		1.39228	1
24	Unknown Sample		Method Settings	5.56338e+06	NA	NA	NA	NA	NA	NA	Response Low	NA		1.39392	1
25	Unknown Sample		Method Settings	6.87764e+06	NA	NA	NA	NA	NA	NA	Response Low	NA		1.39296	1
26	Unknown Sample		Method Settings	6.80781e+06	NA	NA	NA	NA	NA	NA	Response Low	NA		1.39337	1
27	Unknown Sample		Method Settings	5.34766e+06	NA	NA	NA	NA	NA	NA	Response Low	NA		1.39496	1
28	Unknown Sample		Method Settings	4.78457e+06	NA	NA	NA	NA	NA	NA	Response Low	NA		1.39074	1
29	Unknown Sample		Method Settings	4.88878e+06	NA	NA	NA	NA	NA	NA	Response Low	NA		1.39051	1
30	Unknown Sample		Method Settings	5.06528e+06	NA	NA	NA	NA	NA	NA	Response Low	NA		1.39047	1
Created By:
User Name		Full Name		Date
kwelle		Welle, Kevin		6/17/2022 7:54:22 PM

## Sheet: D
Component Name		Curve Index	Weighting Index	Origin Index	Equation
D					N/A
							Specified	Calculated
Filename	Sample Type	Sample Name	Integ. Type	Area	ISTD Area	Area	Amount	Amount	%Diff	%RSD-AMT	Peak Status	Level	Units	RT	Sample ID
blank1	Blank Sample		Method Settings	NF	NA	NF	NA	NF	NF	NF	Not Found	NA		NF	1
blank2	Blank Sample		Method Settings	NF	NA	NF	NA	NF	NF	NF	Not Found	NA		NF	1
blank3	Blank Sample		Method Settings	NF	NA	NF	NA	NF	NF	NF	Not Found	NA		NF	1
blank4	Blank Sample		Method Settings	NF	NA	NF	NA	NF	NF	NF	Not Found	NA		NF	1
blank5	Blank Sample		Method Settings	NF	NA	NF	NA	NF	NF	NF	Not Found	NA		NF	1
01	Unknown Sample		Method Settings	5820.95	NA	NA	NA	NA	NA	NA	Response Low	NA		1.60018	1
02	Unknown Sample		Method Settings	6502.86	NA	NA	NA	NA	NA	NA	Response Low	NA		1.61054	1
03	Unknown Sample		Method Settings	9552.67	NA	NA	NA	NA	NA	NA	Response Low	NA		1.61057	1
04	Unknown Sample		Method Settings	6151.77	NA	NA	NA	NA	NA	NA	Response Low	NA		1.59661	1
05	Unknown Sample		Method Settings	7455.04	NA	NA	NA	NA	NA	NA	Response Low	NA		1.60683	1
06	Unknown Sample		Method Settings	4357.45	NA	NA	NA	NA	NA	NA	Response Low	NA		1.58758	1
07	Unknown Sample		Method Settings	1730.97	NA	NA	NA	NA	NA	NA	Response Low	NA		1.59405	1
08	Unknown Sample		Method Settings	3428.41	NA	NA	NA	NA	NA	NA	Response Low	NA		1.59675	1
09	Unknown Sample		Method Settings	5629.49	NA	NA	NA	NA	NA	NA	Response Low	NA		1.5967	1
10	Unknown Sample		Method Settings	6297.19	NA	NA	NA	NA	NA	NA	Response Low	NA		1.58464	1
11	Unknown Sample		Method Settings	7350.69	NA	NA	NA	NA	NA	NA	Response Low	NA		1.59453	1
12	Unknown Sample		Method Settings	3707.58	NA	NA	NA	NA	NA	NA	Response Low	NA		1.59401	1
13	Unknown Sample		Method Settings	7425.13	NA	NA	NA	NA	NA	NA	Response Low	NA		1.60011	1
14	Unknown Sample		Method Settings	7638.49	NA	NA	NA	NA	NA	NA	Response Low	NA		1.60036	1
15	Unknown Sample		Method Settings	8913.42	NA	NA	NA	NA	NA	NA	Response Low	NA		1.60158	1
16	Unknown Sample		Method Settings	5167.7	NA	NA	NA	NA	NA	NA	Response Low	NA		1.59981	1
17	Unknown Sample		Method Settings	7470.73	NA	NA	NA	NA	NA	NA	Response Low	NA		1.59926	1
18	Unknown Sample		Method Settings	7697.19	NA	NA	NA	NA	NA	NA	Response Low	NA		1.60058	1
19	Unknown Sample		Method Settings	7803.05	NA	NA	NA	NA	NA	NA	Response Low	NA		1.6029	1
20	Unknown Sample		Method Settings	6184.63	NA	NA	NA	NA	NA	NA	Response Low	NA		1.60061	1
21	Unknown Sample		Method Settings	7159.46	NA	NA	NA	NA	NA	NA	Response Low	NA		1.60025	1
22	Unknown Sample		Method Settings	6025.64	NA	NA	NA	NA	NA	NA	Response Low	NA		1.61283	1
23	Unknown Sample		Method Settings	10453.2	NA	NA	NA	NA	NA	NA	Response Low	NA		1.58636	1
24	Unknown Sample		Method Settings	6832.09	NA	NA	NA	NA	NA	NA	Response Low	NA		1.61336	1
25	Unknown Sample		Method Settings	7749.44	NA	NA	NA	NA	NA	NA	Response Low	NA		1.59968	1
26	Unknown Sample		Method Settings	8540.79	NA	NA	NA	NA	NA	NA	Response Low	NA		1.60014	1
27	Unknown Sample		Method Settings	5622.17	NA	NA	NA	NA	NA	NA	Response Low	NA		1.60169	1
28	Unknown Sample		Method Settings	3955.76	NA	NA	NA	NA	NA	NA	Response Low	NA		1.59752	1
29	Unknown Sample		Method Settings	1504.29	NA	NA	NA	NA	NA	NA	Response Low	NA		1.59726	1
30	Unknown Sample		Method Settings	4700.69	NA	NA	NA	NA	NA	NA	Response Low	NA		1.6099	1
Created By:
User Name		Full Name		Date
kwelle		Welle, Kevin		6/17/2022 7:54:22 PM

## Sheet: Ψ
Component Name		Curve Index	Weighting Index	Origin Index	Equation
Ψ					N/A
							Specified	Calculated
Filename	Sample Type	Sample Name	Integ. Type	Area	ISTD Area	Area	Amount	Amount	%Diff	%RSD-AMT	Peak Status	Level	Units	RT	Sample ID
blank1	Blank Sample		Method Settings	NF	NA	NF	NA	NF	NF	NF	Not Found	NA		NF	1
blank2	Blank Sample		Method Settings	NF	NA	NF	NA	NF	NF	NF	Not Found	NA		NF	1
blank3	Blank Sample		Method Settings	NF	NA	NF	NA	NF	NF	NF	Not Found	NA		NF	1
blank4	Blank Sample		Method Settings	NF	NA	NF	NA	NF	NF	NF	Not Found	NA		NF	1
blank5	Blank Sample		Method Settings	NF	NA	NF	NA	NF	NF	NF	Not Found	NA		NF	1
01	Unknown Sample		Method Settings	232700	NA	NA	NA	NA	NA	NA	Response Low	NA		1.58568	1
02	Unknown Sample		Method Settings	244258	NA	NA	NA	NA	NA	NA	Response Low	NA		1.58335	1
03	Unknown Sample		Method Settings	254637	NA	NA	NA	NA	NA	NA	Response Low	NA		1.57067	1
04	Unknown Sample		Method Settings	221122	NA	NA	NA	NA	NA	NA	Response Low	NA		1.58211	1
05	Unknown Sample		Method Settings	243321	NA	NA	NA	NA	NA	NA	Response Low	NA		1.57962	1
06	Unknown Sample		Method Settings	241515	NA	NA	NA	NA	NA	NA	Response Low	NA		1.58576	1
07	Unknown Sample		Method Settings	181392	NA	NA	NA	NA	NA	NA	Response Low	NA		1.57954	1
08	Unknown Sample		Method Settings	171075	NA	NA	NA	NA	NA	NA	Response Low	NA		1.58225	1
09	Unknown Sample		Method Settings	209721	NA	NA	NA	NA	NA	NA	Response Low	NA		1.5695	1
10	Unknown Sample		Method Settings	180131	NA	NA	NA	NA	NA	NA	Response Low	NA		1.55744	1
11	Unknown Sample		Method Settings	211915	NA	NA	NA	NA	NA	NA	Response Low	NA		1.56733	1
12	Unknown Sample		Method Settings	222341	NA	NA	NA	NA	NA	NA	Response Low	NA		1.5795	1
13	Unknown Sample		Method Settings	229180	NA	NA	NA	NA	NA	NA	Response Low	NA		1.57291	1
14	Unknown Sample		Method Settings	254283	NA	NA	NA	NA	NA	NA	Response Low	NA		1.57316	1
15	Unknown Sample		Method Settings	283895	NA	NA	NA	NA	NA	NA	Response Low	NA		1.58707	1
16	Unknown Sample		Method Settings	245267	NA	NA	NA	NA	NA	NA	Response Low	NA		1.57261	1
17	Unknown Sample		Method Settings	274122	NA	NA	NA	NA	NA	NA	Response Low	NA		1.58476	1
18	Unknown Sample		Method Settings	282838	NA	NA	NA	NA	NA	NA	Response Low	NA		1.58607	1
19	Unknown Sample		Method Settings	224436	NA	NA	NA	NA	NA	NA	Response Low	NA		1.57569	1
20	Unknown Sample		Method Settings	239632	NA	NA	NA	NA	NA	NA	Response Low	NA		1.57341	1
21	Unknown Sample		Method Settings	248512	NA	NA	NA	NA	NA	NA	Response Low	NA		1.58574	1
22	Unknown Sample		Method Settings	241229	NA	NA	NA	NA	NA	NA	Response Low	NA		1.58563	1
23	Unknown Sample		Method Settings	253320	NA	NA	NA	NA	NA	NA	Response Low	NA		1.57186	1
24	Unknown Sample		Method Settings	228145	NA	NA	NA	NA	NA	NA	Response Low	NA		1.58615	1
25	Unknown Sample		Method Settings	245010	NA	NA	NA	NA	NA	NA	Response Low	NA		1.57247	1
26	Unknown Sample		Method Settings	235135	NA	NA	NA	NA	NA	NA	Response Low	NA		1.58563	1
27	Unknown Sample		Method Settings	198549	NA	NA	NA	NA	NA	NA	Response Low	NA		1.58719	1
28	Unknown Sample		Method Settings	169384	NA	NA	NA	NA	NA	NA	Response Low	NA		1.57032	1
29	Unknown Sample		Method Settings	170573	NA	NA	NA	NA	NA	NA	Response Low	NA		1.57006	1
30	Unknown Sample		Method Settings	175507	NA	NA	NA	NA	NA	NA	Response Low	NA		1.5827	1
Created By:
User Name		Full Name		Date
kwelle		Welle, Kevin		6/17/2022 7:54:22 PM

## Sheet: m3C
Component Name		Curve Index	Weighting Index	Origin Index	Equation
m3C					N/A
							Specified	Calculated
Filename	Sample Type	Sample Name	Integ. Type	Area	ISTD Area	Area	Amount	Amount	%Diff	%RSD-AMT	Peak Status	Level	Units	RT	Sample ID
blank1	Blank Sample		Method Settings	NF	NA	NF	NA	NF	NF	NF	Not Found	NA		NF	1
blank2	Blank Sample		Method Settings	NF	NA	NF	NA	NF	NF	NF	Not Found	NA		NF	1
blank3	Blank Sample		Method Settings	NF	NA	NF	NA	NF	NF	NF	Not Found	NA		NF	1
blank4	Blank Sample		Method Settings	NF	NA	NF	NA	NF	NF	NF	Not Found	NA		NF	1
blank5	Blank Sample		Method Settings	NF	NA	NF	NA	NF	NF	NF	Not Found	NA		NF	1
01	Unknown Sample		Method Settings	484700	NA	NA	NA	NA	NA	NA	Response Low	NA		1.69087	1
02	Unknown Sample		Method Settings	539563	NA	NA	NA	NA	NA	NA	Response Low	NA		1.68853	1
03	Unknown Sample		Method Settings	677780	NA	NA	NA	NA	NA	NA	Response Low	NA		1.67585	1
04	Unknown Sample		Method Settings	469048	NA	NA	NA	NA	NA	NA	Response Low	NA		1.68733	1
05	Unknown Sample		Method Settings	516352	NA	NA	NA	NA	NA	NA	Response Low	NA		1.68481	1
06	Unknown Sample		Method Settings	492771	NA	NA	NA	NA	NA	NA	Response Low	NA		1.67825	1
07	Unknown Sample		Method Settings	392262	NA	NA	NA	NA	NA	NA	Response Low	NA		1.67203	1
08	Unknown Sample		Method Settings	375247	NA	NA	NA	NA	NA	NA	Response Low	NA		1.67473	1
09	Unknown Sample		Method Settings	461279	NA	NA	NA	NA	NA	NA	Response Low	NA		1.67469	1
10	Unknown Sample		Method Settings	417473	NA	NA	NA	NA	NA	NA	Response Low	NA		1.62453	1
11	Unknown Sample		Method Settings	447284	NA	NA	NA	NA	NA	NA	Response Low	NA		1.67252	1
12	Unknown Sample		Method Settings	497734	NA	NA	NA	NA	NA	NA	Response Low	NA		1.67199	1
13	Unknown Sample		Method Settings	516239	NA	NA	NA	NA	NA	NA	Response Low	NA		1.66539	1
14	Unknown Sample		Method Settings	511339	NA	NA	NA	NA	NA	NA	Response Low	NA		1.66565	1
15	Unknown Sample		Method Settings	568458	NA	NA	NA	NA	NA	NA	Response Low	NA		1.67956	1
16	Unknown Sample		Method Settings	535075	NA	NA	NA	NA	NA	NA	Response Low	NA		1.6651	1
17	Unknown Sample		Method Settings	635608	NA	NA	NA	NA	NA	NA	Response Low	NA		1.66454	1
18	Unknown Sample		Method Settings	604481	NA	NA	NA	NA	NA	NA	Response Low	NA		1.66587	1
19	Unknown Sample		Method Settings	514999	NA	NA	NA	NA	NA	NA	Response Low	NA		1.6682	1
20	Unknown Sample		Method Settings	500335	NA	NA	NA	NA	NA	NA	Response Low	NA		1.6659	1
21	Unknown Sample		Method Settings	529352	NA	NA	NA	NA	NA	NA	Response Low	NA		1.67824	1
22	Unknown Sample		Method Settings	511214	NA	NA	NA	NA	NA	NA	Response Low	NA		1.66541	1
23	Unknown Sample		Method Settings	505556	NA	NA	NA	NA	NA	NA	Response Low	NA		1.66435	1
24	Unknown Sample		Method Settings	455044	NA	NA	NA	NA	NA	NA	Response Low	NA		1.66595	1
25	Unknown Sample		Method Settings	536524	NA	NA	NA	NA	NA	NA	Response Low	NA		1.66496	1
26	Unknown Sample		Method Settings	554567	NA	NA	NA	NA	NA	NA	Response Low	NA		1.66542	1
27	Unknown Sample		Method Settings	424731	NA	NA	NA	NA	NA	NA	Response Low	NA		1.66699	1
28	Unknown Sample		Method Settings	334127	NA	NA	NA	NA	NA	NA	Response Low	NA		1.67551	1
29	Unknown Sample		Method Settings	394752	NA	NA	NA	NA	NA	NA	Response Low	NA		1.66255	1
30	Unknown Sample		Method Settings	376406	NA	NA	NA	NA	NA	NA	Response Low	NA		1.66249	1
Created By:
User Name		Full Name		Date
kwelle		Welle, Kevin		6/17/2022 7:54:22 PM

## Sheet: m1A
Component Name		Curve Index	Weighting Index	Origin Index	Equation
m1A					N/A
							Specified	Calculated
Filename	Sample Type	Sample Name	Integ. Type	Area	ISTD Area	Area	Amount	Amount	%Diff	%RSD-AMT	Peak Status	Level	Units	RT	Sample ID
blank1	Blank Sample		Method Settings	NF	NA	NF	NA	NF	NF	NF	Not Found	NA		NF	1
blank2	Blank Sample		Method Settings	3091.81	NA	NA	NA	NA	NA	NA	Response Low	NA		1.78758	1
blank3	Blank Sample		Method Settings	1134.51	NA	NA	NA	NA	NA	NA	Response Low	NA		1.78743	1
blank4	Blank Sample		Method Settings	NF	NA	NF	NA	NF	NF	NF	Not Found	NA		NF	1
blank5	Blank Sample		Method Settings	1085.29	NA	NA	NA	NA	NA	NA	Response Low	NA		1.75649	1
01	Unknown Sample		Method Settings	5.46949e+07	NA	NA	NA	NA	NA	NA	Response Low	NA		1.79991	1
02	Unknown Sample		Method Settings	5.90993e+07	NA	NA	NA	NA	NA	NA	Response Low	NA		1.79751	1
03	Unknown Sample		Method Settings	5.9475e+07	NA	NA	NA	NA	NA	NA	Response Low	NA		1.79753	1
04	Unknown Sample		Method Settings	4.99024e+07	NA	NA	NA	NA	NA	NA	Response Low	NA		1.78244	1
05	Unknown Sample		Method Settings	5.11577e+07	NA	NA	NA	NA	NA	NA	Response Low	NA		1.79249	1
06	Unknown Sample		Method Settings	5.22016e+07	NA	NA	NA	NA	NA	NA	Response Low	NA		1.78606	1
07	Unknown Sample		Method Settings	4.11634e+07	NA	NA	NA	NA	NA	NA	Response Low	NA		1.76207	1
08	Unknown Sample		Method Settings	4.0115e+07	NA	NA	NA	NA	NA	NA	Response Low	NA		1.76773	1
09	Unknown Sample		Method Settings	4.31973e+07	NA	NA	NA	NA	NA	NA	Response Low	NA		1.76755	1
10	Unknown Sample		Method Settings	4.35772e+07	NA	NA	NA	NA	NA	NA	Response Low	NA		1.70144	1
11	Unknown Sample		Method Settings	4.51857e+07	NA	NA	NA	NA	NA	NA	Response Low	NA		1.76567	1
12	Unknown Sample		Method Settings	4.54239e+07	NA	NA	NA	NA	NA	NA	Response Low	NA		1.76169	1
13	Unknown Sample		Method Settings	5.45865e+07	NA	NA	NA	NA	NA	NA	Response Low	NA		1.75544	1
14	Unknown Sample		Method Settings	5.24459e+07	NA	NA	NA	NA	NA	NA	Response Low	NA		1.77111	1
15	Unknown Sample		Method Settings	5.66822e+07	NA	NA	NA	NA	NA	NA	Response Low	NA		1.77238	1
16	Unknown Sample		Method Settings	5.05079e+07	NA	NA	NA	NA	NA	NA	Response Low	NA		1.77047	1
17	Unknown Sample		Method Settings	6.03098e+07	NA	NA	NA	NA	NA	NA	Response Low	NA		1.7699	1
18	Unknown Sample		Method Settings	5.75455e+07	NA	NA	NA	NA	NA	NA	Response Low	NA		1.75591	1
19	Unknown Sample		Method Settings	4.8654e+07	NA	NA	NA	NA	NA	NA	Response Low	NA		1.77362	1
20	Unknown Sample		Method Settings	5.34712e+07	NA	NA	NA	NA	NA	NA	Response Low	NA		1.75547	1
21	Unknown Sample		Method Settings	5.42769e+07	NA	NA	NA	NA	NA	NA	Response Low	NA		1.77119	1
22	Unknown Sample		Method Settings	5.31402e+07	NA	NA	NA	NA	NA	NA	Response Low	NA		1.77134	1
23	Unknown Sample		Method Settings	5.32992e+07	NA	NA	NA	NA	NA	NA	Response Low	NA		1.75439	1
24	Unknown Sample		Method Settings	4.75164e+07	NA	NA	NA	NA	NA	NA	Response Low	NA		1.75599	1
25	Unknown Sample		Method Settings	5.01362e+07	NA	NA	NA	NA	NA	NA	Response Low	NA		1.77064	1
26	Unknown Sample		Method Settings	5.00227e+07	NA	NA	NA	NA	NA	NA	Response Low	NA		1.75547	1
27	Unknown Sample		Method Settings	4.0815e+07	NA	NA	NA	NA	NA	NA	Response Low	NA		1.7725	1
28	Unknown Sample		Method Settings	3.37226e+07	NA	NA	NA	NA	NA	NA	Response Low	NA		1.76881	1
29	Unknown Sample		Method Settings	3.78863e+07	NA	NA	NA	NA	NA	NA	Response Low	NA		1.76811	1
30	Unknown Sample		Method Settings	3.85298e+07	NA	NA	NA	NA	NA	NA	Response Low	NA		1.76808	1
Created By:
User Name		Full Name		Date
kwelle		Welle, Kevin		6/17/2022 7:54:22 PM

## Sheet: m5C
Component Name		Curve Index	Weighting Index	Origin Index	Equation
m5C					N/A
							Specified	Calculated
Filename	Sample Type	Sample Name	Integ. Type	Area	ISTD Area	Area	Amount	Amount	%Diff	%RSD-AMT	Peak Status	Level	Units	RT	Sample ID
blank1	Blank Sample		Method Settings	NF	NA	NF	NA	NF	NF	NF	Not Found	NA		NF	1
blank2	Blank Sample		Method Settings	NF	NA	NF	NA	NF	NF	NF	Not Found	NA		NF	1
blank3	Blank Sample		Method Settings	NF	NA	NF	NA	NF	NF	NF	Not Found	NA		NF	1
blank4	Blank Sample		Method Settings	NF	NA	NF	NA	NF	NF	NF	Not Found	NA		NF	1
blank5	Blank Sample		Method Settings	NF	NA	NF	NA	NF	NF	NF	Not Found	NA		NF	1
01	Unknown Sample		Method Settings	546354	NA	NA	NA	NA	NA	NA	Response Low	NA		1.90947	1
02	Unknown Sample		Method Settings	574910	NA	NA	NA	NA	NA	NA	Response Low	NA		1.90891	1
03	Unknown Sample		Method Settings	599737	NA	NA	NA	NA	NA	NA	Response Low	NA		1.89628	1
04	Unknown Sample		Method Settings	528663	NA	NA	NA	NA	NA	NA	Response Low	NA		1.8954	1
05	Unknown Sample		Manual Integration	584341	NA	NA	NA	NA	NA	NA	Response Low	NA		1.89126	1
06	Unknown Sample		Method Settings	547683	NA	NA	NA	NA	NA	NA	Response Low	NA		1.89739	1
07	Unknown Sample		Method Settings	429083	NA	NA	NA	NA	NA	NA	Response Low	NA		1.89189	1
08	Unknown Sample		Method Settings	408914	NA	NA	NA	NA	NA	NA	Response Low	NA		1.89662	1
09	Unknown Sample		Manual Integration	483060	NA	NA	NA	NA	NA	NA	Response Low	NA		1.88347	1
10	Unknown Sample		Manual Integration	414750	NA	NA	NA	NA	NA	NA	Response Low	NA		1.79308	1
11	Unknown Sample		Method Settings	503235	NA	NA	NA	NA	NA	NA	Response Low	NA		1.88139	1
12	Unknown Sample		Method Settings	507573	NA	NA	NA	NA	NA	NA	Response Low	NA		1.87847	1
13	Unknown Sample		Method Settings	598172	NA	NA	NA	NA	NA	NA	Response Low	NA		1.88642	1
14	Unknown Sample		Method Settings	588692	NA	NA	NA	NA	NA	NA	Response Low	NA		1.88472	1
15	Unknown Sample		Method Settings	674195	NA	NA	NA	NA	NA	NA	Response Low	NA		1.88549	1
16	Unknown Sample		Method Settings	568171	NA	NA	NA	NA	NA	NA	Response Low	NA		1.88597	1
17	Unknown Sample		Manual Integration	723433	NA	NA	NA	NA	NA	NA	Response Low	NA		1.88491	1
18	Unknown Sample		Manual Integration	717161	NA	NA	NA	NA	NA	NA	Response Low	NA		1.87195	1
19	Unknown Sample		Manual Integration	515727	NA	NA	NA	NA	NA	NA	Response Low	NA		1.88732	1
20	Unknown Sample		Manual Integration	564097	NA	NA	NA	NA	NA	NA	Response Low	NA		1.87401	1
21	Unknown Sample		Method Settings	563906	NA	NA	NA	NA	NA	NA	Response Low	NA		1.88456	1
22	Unknown Sample		Method Settings	549435	NA	NA	NA	NA	NA	NA	Response Low	NA		1.88454	1
23	Unknown Sample		Method Settings	540420	NA	NA	NA	NA	NA	NA	Response Low	NA		1.88559	1
24	Unknown Sample		Manual Integration	512756	NA	NA	NA	NA	NA	NA	Response Low	NA		1.88565	1
25	Unknown Sample		Manual Integration	558925	NA	NA	NA	NA	NA	NA	Response Low	NA		1.87352	1
26	Unknown Sample		Method Settings	567355	NA	NA	NA	NA	NA	NA	Response Low	NA		1.88669	1
27	Unknown Sample		Manual Integration	481906	NA	NA	NA	NA	NA	NA	Response Low	NA		1.87398	1
28	Unknown Sample		Manual Integration	391846	NA	NA	NA	NA	NA	NA	Response Low	NA		1.88498	1
29	Unknown Sample		Manual Integration	401931	NA	NA	NA	NA	NA	NA	Response Low	NA		1.88432	1
30	Unknown Sample		Manual Integration	395228	NA	NA	NA	NA	NA	NA	Response Low	NA		1.88433	1
Created By:
User Name		Full Name		Date
kwelle		Welle, Kevin		6/17/2022 7:54:22 PM

## Sheet: ncm5U
Component Name		Curve Index	Weighting Index	Origin Index	Equation
ncm5U					N/A
							Specified	Calculated
Filename	Sample Type	Sample Name	Integ. Type	Area	ISTD Area	Area	Amount	Amount	%Diff	%RSD-AMT	Peak Status	Level	Units	RT	Sample ID
blank1	Blank Sample		Method Settings	NF	NA	NF	NA	NF	NF	NF	Not Found	NA		NF	1
blank2	Blank Sample		Method Settings	NF	NA	NF	NA	NF	NF	NF	Not Found	NA		NF	1
blank3	Blank Sample		Method Settings	NF	NA	NF	NA	NF	NF	NF	Not Found	NA		NF	1
blank4	Blank Sample		Method Settings	NF	NA	NF	NA	NF	NF	NF	Not Found	NA		NF	1
blank5	Blank Sample		Method Settings	NF	NA	NF	NA	NF	NF	NF	Not Found	NA		NF	1
01	Unknown Sample		Method Settings	21681	NA	NA	NA	NA	NA	NA	Response Low	NA		2.1017	1
02	Unknown Sample		Method Settings	27056.6	NA	NA	NA	NA	NA	NA	Response Low	NA		2.12295	1
03	Unknown Sample		Method Settings	24244.3	NA	NA	NA	NA	NA	NA	Response Low	NA		2.1121	1
04	Unknown Sample		Method Settings	22524.1	NA	NA	NA	NA	NA	NA	Response Low	NA		2.11122	1
05	Unknown Sample		Method Settings	23208.8	NA	NA	NA	NA	NA	NA	Response Low	NA		2.09799	1
06	Unknown Sample		Method Settings	22491.7	NA	NA	NA	NA	NA	NA	Response Low	NA		2.11318	1
07	Unknown Sample		Method Settings	18650.8	NA	NA	NA	NA	NA	NA	Response Low	NA		2.10953	1
08	Unknown Sample		Method Settings	16369.4	NA	NA	NA	NA	NA	NA	Response Low	NA		2.11244	1
09	Unknown Sample		Method Settings	17541.6	NA	NA	NA	NA	NA	NA	Response Low	NA		2.10107	1
10	Unknown Sample		Method Settings	18995.9	NA	NA	NA	NA	NA	NA	Response Low	NA		2.01434	1
11	Unknown Sample		Method Settings	15049.5	NA	NA	NA	NA	NA	NA	Response Low	NA		2.1099	1
12	Unknown Sample		Method Settings	23766.2	NA	NA	NA	NA	NA	NA	Response Low	NA		2.09792	1
13	Unknown Sample		Method Settings	21753.9	NA	NA	NA	NA	NA	NA	Response Low	NA		2.10406	1
14	Unknown Sample		Method Settings	24489.6	NA	NA	NA	NA	NA	NA	Response Low	NA		2.0915	1
15	Unknown Sample		Method Settings	30290.6	NA	NA	NA	NA	NA	NA	Response Low	NA		2.12489	1
16	Unknown Sample		Method Settings	21719.6	NA	NA	NA	NA	NA	NA	Response Low	NA		2.10359	1
17	Unknown Sample		Method Settings	29731.2	NA	NA	NA	NA	NA	NA	Response Low	NA		2.10256	1
18	Unknown Sample		Method Settings	22920.7	NA	NA	NA	NA	NA	NA	Response Low	NA		2.10231	1
19	Unknown Sample		Method Settings	17168.7	NA	NA	NA	NA	NA	NA	Response Low	NA		2.10497	1
20	Unknown Sample		Method Settings	19179.5	NA	NA	NA	NA	NA	NA	Response Low	NA		2.10435	1
21	Unknown Sample		Method Settings	23752	NA	NA	NA	NA	NA	NA	Response Low	NA		2.11308	1
22	Unknown Sample		Method Settings	24842.3	NA	NA	NA	NA	NA	NA	Response Low	NA		2.11305	1
23	Unknown Sample		Method Settings	25386.5	NA	NA	NA	NA	NA	NA	Response Low	NA		2.10323	1
24	Unknown Sample		Method Settings	22279.8	NA	NA	NA	NA	NA	NA	Response Low	NA		2.11418	1
25	Unknown Sample		Method Settings	24044.2	NA	NA	NA	NA	NA	NA	Response Low	NA		2.10384	1
26	Unknown Sample		Method Settings	15588.7	NA	NA	NA	NA	NA	NA	Response Low	NA		2.10432	1
27	Unknown Sample		Method Settings	19208.8	NA	NA	NA	NA	NA	NA	Response Low	NA		2.1043	1
28	Unknown Sample		Method Settings	12479.7	NA	NA	NA	NA	NA	NA	Response Low	NA		2.11352	1
29	Unknown Sample		Method Settings	11829.1	NA	NA	NA	NA	NA	NA	Response Low	NA		2.10196	1
30	Unknown Sample		Method Settings	9471.44	NA	NA	NA	NA	NA	NA	Response Low	NA		2.13463	1
Created By:
User Name		Full Name		Date
kwelle		Welle, Kevin		6/17/2022 7:54:22 PM

## Sheet: U
Component Name		Curve Index	Weighting Index	Origin Index	Equation
U					N/A
							Specified	Calculated
Filename	Sample Type	Sample Name	Integ. Type	Area	ISTD Area	Area	Amount	Amount	%Diff	%RSD-AMT	Peak Status	Level	Units	RT	Sample ID
blank1	Blank Sample		Method Settings	NF	NA	NF	NA	NF	NF	NF	Not Found	NA		NF	1
blank2	Blank Sample		Method Settings	NF	NA	NF	NA	NF	NF	NF	Not Found	NA		NF	1
blank3	Blank Sample		Method Settings	NF	NA	NF	NA	NF	NF	NF	Not Found	NA		NF	1
blank4	Blank Sample		Method Settings	NF	NA	NF	NA	NF	NF	NF	Not Found	NA		NF	1
blank5	Blank Sample		Method Settings	NF	NA	NF	NA	NF	NF	NF	Not Found	NA		NF	1
01	Unknown Sample		Method Settings	72607.6	NA	NA	NA	NA	NA	NA	Response Low	NA		2.42814	1
02	Unknown Sample		Method Settings	86665.1	NA	NA	NA	NA	NA	NA	Response Low	NA		2.43671	1
03	Unknown Sample		Method Settings	85904.1	NA	NA	NA	NA	NA	NA	Response Low	NA		2.42767	1
04	Unknown Sample		Method Settings	79937.5	NA	NA	NA	NA	NA	NA	Response Low	NA		2.43771	1
05	Unknown Sample		Method Settings	100473	NA	NA	NA	NA	NA	NA	Response Low	NA		2.43531	1
06	Unknown Sample		Method Settings	95064	NA	NA	NA	NA	NA	NA	Response Low	NA		2.42874	1
07	Unknown Sample		Method Settings	56927.8	NA	NA	NA	NA	NA	NA	Response Low	NA		2.43597	1
08	Unknown Sample		Method Settings	52484.7	NA	NA	NA	NA	NA	NA	Response Low	NA		2.44614	1
09	Unknown Sample		Method Settings	57138.2	NA	NA	NA	NA	NA	NA	Response Low	NA		2.42751	1
10	Unknown Sample		Method Settings	56446.8	NA	NA	NA	NA	NA	NA	Response Low	NA		2.33715	1
11	Unknown Sample		Method Settings	67012.1	NA	NA	NA	NA	NA	NA	Response Low	NA		2.43634	1
12	Unknown Sample		Method Settings	70293.2	NA	NA	NA	NA	NA	NA	Response Low	NA		2.43529	1
13	Unknown Sample		Method Settings	70803.4	NA	NA	NA	NA	NA	NA	Response Low	NA		2.42144	1
14	Unknown Sample		Method Settings	77679.4	NA	NA	NA	NA	NA	NA	Response Low	NA		2.4379	1
15	Unknown Sample		Method Settings	89609.4	NA	NA	NA	NA	NA	NA	Response Low	NA		2.4387	1
16	Unknown Sample		Method Settings	70711.1	NA	NA	NA	NA	NA	NA	Response Low	NA		2.43004	1
17	Unknown Sample		Method Settings	100132	NA	NA	NA	NA	NA	NA	Response Low	NA		2.42902	1
18	Unknown Sample		Method Settings	90092.7	NA	NA	NA	NA	NA	NA	Response Low	NA		2.42878	1
19	Unknown Sample		Method Settings	62744.9	NA	NA	NA	NA	NA	NA	Response Low	NA		2.4314	1
20	Unknown Sample		Method Settings	77255.2	NA	NA	NA	NA	NA	NA	Response Low	NA		2.43987	1
21	Unknown Sample		Method Settings	82860.4	NA	NA	NA	NA	NA	NA	Response Low	NA		2.42865	1
22	Unknown Sample		Method Settings	72987.4	NA	NA	NA	NA	NA	NA	Response Low	NA		2.43767	1
23	Unknown Sample		Method Settings	73555.1	NA	NA	NA	NA	NA	NA	Response Low	NA		2.43874	1
24	Unknown Sample		Method Settings	69340.2	NA	NA	NA	NA	NA	NA	Response Low	NA		2.42979	1
25	Unknown Sample		Method Settings	80133.4	NA	NA	NA	NA	NA	NA	Response Low	NA		2.43935	1
26	Unknown Sample		Method Settings	76454.9	NA	NA	NA	NA	NA	NA	Response Low	NA		2.43983	1
27	Unknown Sample		Method Settings	55770.7	NA	NA	NA	NA	NA	NA	Response Low	NA		2.4398	1
28	Unknown Sample		Method Settings	49487.4	NA	NA	NA	NA	NA	NA	Response Low	NA		2.42908	1
29	Unknown Sample		Method Settings	49205.6	NA	NA	NA	NA	NA	NA	Response Low	NA		2.42842	1
30	Unknown Sample		Method Settings	50936.1	NA	NA	NA	NA	NA	NA	Response Low	NA		2.42845	1
Created By:
User Name		Full Name		Date
kwelle		Welle, Kevin		6/17/2022 7:54:22 PM

## Sheet: Cm
Component Name		Curve Index	Weighting Index	Origin Index	Equation
Cm					N/A
							Specified	Calculated
Filename	Sample Type	Sample Name	Integ. Type	Area	ISTD Area	Area	Amount	Amount	%Diff	%RSD-AMT	Peak Status	Level	Units	RT	Sample ID
blank1	Blank Sample		Method Settings	NF	NA	NF	NA	NF	NF	NF	Not Found	NA		NF	1
blank2	Blank Sample		Method Settings	NF	NA	NF	NA	NF	NF	NF	Not Found	NA		NF	1
blank3	Blank Sample		Method Settings	NF	NA	NF	NA	NF	NF	NF	Not Found	NA		NF	1
blank4	Blank Sample		Method Settings	NF	NA	NF	NA	NF	NF	NF	Not Found	NA		NF	1
blank5	Blank Sample		Method Settings	NF	NA	NF	NA	NF	NF	NF	Not Found	NA		NF	1
01	Unknown Sample		Method Settings	34355.2	NA	NA	NA	NA	NA	NA	Response Low	NA		2.99552	1
02	Unknown Sample		Method Settings	37858.3	NA	NA	NA	NA	NA	NA	Response Low	NA		2.9875	1
03	Unknown Sample		Method Settings	33140.3	NA	NA	NA	NA	NA	NA	Response Low	NA		2.97282	1
04	Unknown Sample		Method Settings	37936.8	NA	NA	NA	NA	NA	NA	Response Low	NA		2.97392	1
05	Unknown Sample		Method Settings	38582.6	NA	NA	NA	NA	NA	NA	Response Low	NA		2.97174	1
06	Unknown Sample		Method Settings	36111.1	NA	NA	NA	NA	NA	NA	Response Low	NA		2.97432	1
07	Unknown Sample		Method Settings	30149.5	NA	NA	NA	NA	NA	NA	Response Low	NA		2.95788	1
08	Unknown Sample		Method Settings	26372	NA	NA	NA	NA	NA	NA	Response Low	NA		2.96635	1
09	Unknown Sample		Method Settings	31257.4	NA	NA	NA	NA	NA	NA	Response Low	NA		2.96582	1
10	Unknown Sample		Manual Integration	27403.1	NA	NA	NA	NA	NA	NA	Response Low	NA		2.83556	1
11	Unknown Sample		Method Settings	31127.5	NA	NA	NA	NA	NA	NA	Response Low	NA		2.94381	1
12	Unknown Sample		Method Settings	33335.7	NA	NA	NA	NA	NA	NA	Response Low	NA		2.97337	1
13	Unknown Sample		Method Settings	35235.5	NA	NA	NA	NA	NA	NA	Response Low	NA		2.94686	1
14	Unknown Sample		Method Settings	36336.3	NA	NA	NA	NA	NA	NA	Response Low	NA		2.94508	1
15	Unknown Sample		Method Settings	37927.9	NA	NA	NA	NA	NA	NA	Response Low	NA		2.95343	1
16	Unknown Sample		Method Settings	36964.5	NA	NA	NA	NA	NA	NA	Response Low	NA		2.94657	1
17	Unknown Sample		Method Settings	40527.1	NA	NA	NA	NA	NA	NA	Response Low	NA		2.94556	1
18	Unknown Sample		Method Settings	40513	NA	NA	NA	NA	NA	NA	Response Low	NA		2.93807	1
19	Unknown Sample		Method Settings	36535.1	NA	NA	NA	NA	NA	NA	Response Low	NA		2.95521	1
20	Unknown Sample		Method Settings	41875.7	NA	NA	NA	NA	NA	NA	Response Low	NA		2.94736	1
21	Unknown Sample		Method Settings	46708.6	NA	NA	NA	NA	NA	NA	Response Low	NA		2.95245	1
22	Unknown Sample		Method Settings	35690.4	NA	NA	NA	NA	NA	NA	Response Low	NA		2.94519	1
23	Unknown Sample		Method Settings	42087.6	NA	NA	NA	NA	NA	NA	Response Low	NA		2.93173	1
24	Unknown Sample		Method Settings	39087.4	NA	NA	NA	NA	NA	NA	Response Low	NA		2.93182	1
25	Unknown Sample		Method Settings	36958.8	NA	NA	NA	NA	NA	NA	Response Low	NA		2.93232	1
26	Unknown Sample		Method Settings	34450.7	NA	NA	NA	NA	NA	NA	Response Low	NA		2.93279	1
27	Unknown Sample		Method Settings	32077.1	NA	NA	NA	NA	NA	NA	Response Low	NA		2.92552	1
28	Unknown Sample		Method Settings	20400.5	NA	NA	NA	NA	NA	NA	Response Low	NA		2.96018	1
29	Unknown Sample		Method Settings	21191	NA	NA	NA	NA	NA	NA	Response Low	NA		2.93049	1
30	Unknown Sample		Method Settings	25557.9	NA	NA	NA	NA	NA	NA	Response Low	NA		2.93773	1
Created By:
User Name		Full Name		Date
kwelle		Welle, Kevin		6/17/2022 7:54:22 PM

[truncated: 26 more sheets: A, Um, G, I, Q, m5U, Am, m1G, Gm, m1I, m2A, m2G, ac4C, mcm5U, cm5U, ncm5s2U, m5Um, m22G, m62A, mcm5s2U …]
