# Supplementary material for: Proteolytic cleavage and inactivation of the TRMT1 tRNA modification enzyme by SARS-CoV-2 main protease
Source: eLife. 2024 May 30;12:RP90316. doi: 10.7554/eLife.90316 (PMC11139479; doi:10.7554/eLife.90316)
Supplement: Figure 6—source data 2. [file elife-90316-fig6-data2.xlsx]

## Sheet: Delta Ct CoV-Gapdh
Manip TRMT1 M364
Format 96w																					average	SD
24 hpi																			NI	Ct	0.000304159	0.000404772
																				KO	0.000101299	1.49748e-05
																				wt	0.000199399	2.51101e-05
																				Q530N	0.00012484	0.000103504
	Pos	CtCoV2	Pos	Ct GAPDH	expression CoV-2	expression gapdh	CoV2/gapdh	Average	SD					Average	SD				MOI 0.05	Ct	0.718498	0.180232
Ct Ni	A1	27.85	A13	17.51	4.13347e-09	5.35753e-06	0.000771525	0.000304159	0.000404772				Ct Ni	0.000304159	0.000404772					KO	0.10473	0.172186
	A2	31.62	A14	17.91	3.02992e-10	4.06025e-06	7.4624e-05						Ct 0.05	0.718498	0.180232					wt	0.343037	0.213917
	A3	31.6	A15	17.72	3.07222e-10	4.63179e-06	6.6329e-05						Ct 0.1	1.27067	0.376394					Q530N	0.698555	0.36386
Ct 0.05	A4	18.57	A16	17.73	2.56964e-06	4.59979e-06	0.558644	0.718498	0.180232				Ct 0.2	3.27326	0.303197				MOI 0.1	Ct	1.27067	0.376394
	A5	17.8	A17	17.67	4.38194e-06	4.79513e-06	0.913831						KO Ni	0.000101299	1.49748e-05					KO	0.447929	0.187338
	A6	17.77	A18	17.22	4.47401e-06	6.55033e-06	0.68302						KO 0.05	0.10473	0.172186					wt	1.21264	0.238628
Ct 0.1	A7	17.59	A19	17.67	5.06853e-06	4.79513e-06	1.05702	1.27067	0.376394				KO 0.1	0.447929	0.187338					Q530N	2.37399	0.352234
	A8	17.01	A20	17.78	7.57669e-06	4.44311e-06	1.70527						KO 0.2	0.724065	0.266888				MOI 0.2	Ct	3.27326	0.303197
	A9	17.56	A21	17.63	5.17503e-06	4.92993e-06	1.04972						wt Ni	0.000199399	2.51101e-05					KO	0.724065	0.266888
Ct 0.2	A10	15.54	A22	17.22	2.09891e-05	6.55033e-06	3.20428	3.27326	0.303197				wt 0.05	0.343037	0.213917					wt	1.54506	0.679608
	A11	15.74	A23	17.33	1.82721e-05	6.06946e-06	3.01049						wt 0.1	1.21264	0.238628					Q530N	3.41203	0.583268
	A12	15.46	A24	17.31	2.21859e-05	6.15419e-06	3.605						wt 0.2	1.54506	0.679608
KO Ni	B1	31.61	B13	18.52	3.051e-10	2.66026e-06	0.000114688	0.000101299	1.49748e-05				Q530 Ni	0.00012484	0.000103504
	B2	31.58	B14	18.06	3.11511e-10	3.6593e-06	8.51284e-05						Q530 0.05	0.698555	0.36386
	B3	31.54	B15	18.31	3.20268e-10	3.07709e-06	0.000104081						Q530 0.1	2.37399	0.352234
KO 0.05	B4	21.54	B16	19.82	3.27955e-07	1.0804e-06	0.303549	0.10473	0.172186				Q530 0.2	3.41203	0.583268
	B5	25.7	B17	18.45	1.83455e-08	2.79252e-06	0.0065695
	B6	26.67	B18	18.73	9.36548e-09	2.2999e-06	0.00407213
KO 0.1	B7	17.77	B19	16.86	4.47401e-06	8.40687e-06	0.532185	0.447929	0.187338
	B8	18.91	B20	16.81	2.03013e-06	8.70334e-06	0.233258
	B9	17.73	B21	16.94	4.59979e-06	7.95338e-06	0.578344
KO 0.2	B10	17.34	B22	16.42	6.02754e-06	1.14048e-05	0.528509	0.724065	0.266888
	B11	17.64	B23	16.94	4.89588e-06	7.95338e-06	0.615572
	B12	17.47	B24	17.51	5.50815e-06	5.35753e-06	1.02811
wt Ni	C1	29.88	C13	17.64	1.0121e-09	4.89588e-06	0.000206725	0.000199399	2.51101e-05
	C2	30.01	C14	17.86	9.24889e-10	4.20343e-06	0.000220032
	C3	30.17	C15	17.66	8.27799e-10	4.82848e-06	0.000171441
wt 0.05	C4	21.34	C16	17.96	3.76721e-07	3.92194e-06	0.0960547	0.343037	0.213917
	C5	18.8	C17	17.69	2.19097e-06	4.72911e-06	0.463294
	C6	18.68	C18	17.59	2.381e-06	5.06853e-06	0.469761
wt 0.1	C7	17.24	C19	17.45	6.46015e-06	5.58504e-06	1.15669	1.21264	0.238628
	C8	17.23	C20	17.79	6.50509e-06	4.41242e-06	1.47427
	C9	17.33	C21	17.34	6.06946e-06	6.02754e-06	1.00696
wt 0.2	C10	17.37	C22	17.6	5.90349e-06	5.03352e-06	1.17283	1.54506	0.679608
	C11	17.54	C23	17.72	5.24728e-06	4.63179e-06	1.13288
	C12	16.13	C24	17.35	1.3944e-05	5.9859e-06	2.32947
Q530 Ni	D1	30.07	D13	18.02	8.87213e-10	3.76218e-06	0.000235824	0.00012484	0.000103504
	D2	32.43	D14	17.45	1.72821e-10	5.58504e-06	3.09436e-05
	D3	30.43	D15	17.25	6.91285e-10	6.41553e-06	0.000107752
Q530 0.05	D4	18.59	D16	17.85	2.53427e-06	4.23267e-06	0.598739	0.698555	0.36386
	D5	17.12	D17	17.26	7.02047e-06	6.37122e-06	1.10191
	D6	18.57	D18	17.23	2.56964e-06	6.50509e-06	0.395021
Q530 0.1	D7	16.55	D19	18	1.04221e-05	3.8147e-06	2.73208	2.37399	0.352234
	D8	17.04	D20	18.28	7.42077e-06	3.14175e-06	2.36199
	D9	16.81	D21	17.83	8.70334e-06	4.29176e-06	2.02792
Q530 0.2	D10	16.43	D22	17.95	1.1326e-05	3.94922e-06	2.86791	3.41203	0.583268
	D11	16.61	D23	18.35	9.99751e-06	2.99295e-06	3.34035
	D12	15.97	D24	17.98	1.55794e-05	3.86795e-06	4.02782
													Average				SD								Moyennes				Ecart types
													Ctl	TRMT1-KO	wt	Q530N	Ctl	TRMT1-KO	wt	Q530N					Ctl	TRMT1-KO	wt	Q530N	Ctl	TRMT1-KO	wt	Q530N
												NI	0.000304159	0.000101299	0.000199399	0.00012484	0.000404772	1.49748e-05	2.51101e-05	0.000103504				NI	0.000304159	0.000101299	0.000199399	0.00012484	0.000404772	1.49748e-05	2.51101e-05	0.000103504
												0.05	0.718498	0.10473	0.343037	0.698555	0.180232	0.172186	0.213917	0.36386				0.05	0.718498	0.10473	0.343037	0.698555	0.180232	0.172186	0.213917	0.36386	0.250846	0.125911	0.156427	0.130659
												0.1	1.27067	0.447929	1.21264	2.37399	0.376394	0.187338	0.238628	0.352234				0.1	1.27067	0.447929	1.21264	2.37399	0.376394	0.187338	0.238628	0.352234	0.296217	0.0457619	0.0582909	0.0439503
												0.2	3.27326	0.724065	1.54506	3.41203	0.303197	0.266888	0.679608	0.583268				0.2	3.27326	0.724065	1.54506	3.41203	0.303197	0.266888	0.679608	0.583268	0.0926286	0.0160003	0.0407435	0.0158344
																									Moyennes				Ecart types
																								MOI	Ctl	TRMT1-KO	wt	Q530N	Ctl	TRMT1-KO	wt	Q530N
																								0.05	1	0.145762	0.477436	0.972243	0.250846	0.125911	0.156427	0.130659
																								0.1	1	0.352515	0.954331	1.8683	0.296217	0.0457619	0.0582909	0.0439503
																								0.2	1	0.221206	0.472026	1.0424	0.0926286	0.0160003	0.0407435	0.0158344
																									Moyennes				Ecart types
																								MOI	Ctl	TRMT1-KO	wt	Q530N	Ctl	TRMT1-KO	wt	Q530N
																								0.05	1	0.145762	0.477436	0.972243	0.250846	0.125911	0.156427	0.130659
																								0.1	1	0.352515	0.954331	1.8683	0.296217	0.0457619	0.0582909	0.0439503
																								0.2	1	0.221206	0.472026	1.0424	0.0926286	0.0160003	0.0407435	0.0158344
