# Supplementary material for: Proteolytic cleavage and inactivation of the TRMT1 tRNA modification enzyme by SARS-CoV-2 main protease
Source: eLife. 2024 May 30;12:RP90316. doi: 10.7554/eLife.90316 (PMC11139479; doi:10.7554/eLife.90316)
Supplement: Figure 7—source data 2. [file elife-90316-fig7-data2.xlsx]

## Sheet: Sheet1
Sample	Well	Gene	BioRep	Cq
Ct Ni	A1	CoV	1	29.85
Ct Ni	A2	CoV	2	31.62
Ct Ni	A3	CoV	3	31.6
Ct 0.05	A4	CoV	1	18.57
Ct 0.05	A5	CoV	2	17.8
Ct 0.05	A6	CoV	3	17.77
Ct 0.1	A7	CoV	1	17.59
Ct 0.1	A8	CoV	2	17.01
Ct 0.1	A9	CoV	3	17.56
Ct 0.2	A10	CoV	1	15.54
Ct 0.2	A11	CoV	2	15.74
Ct 0.2	A12	CoV	3	15.46
KO Ni	B1	CoV	1	31.61
KO Ni	B2	CoV	2	31.58
KO Ni	B3	CoV	3	31.54
KO 0.05	B4	CoV	1	24.54
KO 0.05	B5	CoV	2	25.7
KO 0.05	B6	CoV	3	26.67
KO 0.1	B7	CoV	1	17.77
KO 0.1	B8	CoV	2	18.91
KO 0.1	B9	CoV	3	17.73
KO 0.2	B10	CoV	1	17.34
KO 0.2	B11	CoV	2	17.64
KO 0.2	B12	CoV	3	17.47
wt Ni	C1	CoV	1	29.88
wt Ni	C2	CoV	2	30.01
wt Ni	C3	CoV	3	30.17
wt 0.05	C4	CoV	1	19.34
wt 0.05	C5	CoV	2	18.8
wt 0.05	C6	CoV	3	18.68
wt 0.1	C7	CoV	1	17.24
wt 0.1	C8	CoV	2	17.23
wt 0.1	C9	CoV	3	17.33
wt 0.2	C10	CoV	1	17.37
wt 0.2	C11	CoV	2	17.54
wt 0.2	C12	CoV	3	16.13
Q530 Ni	D1	CoV	1	30.07
Q530 Ni	D2	CoV	2	30.43
Q530 Ni	D3	CoV	3	30.43
Q530 0.05	D4	CoV	1	18.59
Q530 0.05	D5	CoV	2	17.12
Q530 0.05	D6	CoV	3	18.57
Q530 0.1	D7	CoV	1	16.55
Q530 0.1	D8	CoV	2	17.04
Q530 0.1	D9	CoV	3	16.81
Q530 0.2	D10	CoV	1	16.43
Q530 0.2	D11	CoV	2	16.61
Q530 0.2	D12	CoV	3	15.97
Ct Ni	A13	GAPDH	1	17.51
Ct Ni	A14	GAPDH	2	17.91
Ct Ni	A15	GAPDH	3	17.72
Ct 0.05	A16	GAPDH	1	17.73
Ct 0.05	A17	GAPDH	2	17.67
Ct 0.05	A18	GAPDH	3	17.22
Ct 0.1	A19	GAPDH	1	17.67
Ct 0.1	A20	GAPDH	2	17.78
Ct 0.1	A21	GAPDH	3	17.63
Ct 0.2	A22	GAPDH	1	17.22
Ct 0.2	A23	GAPDH	2	17.33
Ct 0.2	A24	GAPDH	3	17.31
KO Ni	B13	GAPDH	1	18.52
KO Ni	B14	GAPDH	2	18.06
KO Ni	B15	GAPDH	3	18.31
KO 0.05	B16	GAPDH	1	18.82
KO 0.05	B17	GAPDH	2	18.45
KO 0.05	B18	GAPDH	3	18.73
KO 0.1	B19	GAPDH	1	16.86
KO 0.1	B20	GAPDH	2	16.81
KO 0.1	B21	GAPDH	3	16.94
KO 0.2	B22	GAPDH	1	16.42
KO 0.2	B23	GAPDH	2	16.94
KO 0.2	B24	GAPDH	3	17.51
wt Ni	C13	GAPDH	1	17.64
wt Ni	C14	GAPDH	2	17.86
wt Ni	C15	GAPDH	3	17.66
wt 0.05	C16	GAPDH	1	17.96
wt 0.05	C17	GAPDH	2	17.69
wt 0.05	C18	GAPDH	3	17.59
wt 0.1	C19	GAPDH	1	17.45
wt 0.1	C20	GAPDH	2	17.79
wt 0.1	C21	GAPDH	3	17.34
wt 0.2	C22	GAPDH	1	17.6
wt 0.2	C23	GAPDH	2	17.72
wt 0.2	C24	GAPDH	3	17.35
Q530 Ni	D13	GAPDH	1	18.02
Q530 Ni	D14	GAPDH	2	17.45
Q530 Ni	D15	GAPDH	3	17.25
Q530 0.05	D16	GAPDH	1	17.85
Q530 0.05	D17	GAPDH	2	17.26
Q530 0.05	D18	GAPDH	3	17.23
Q530 0.1	D19	GAPDH	1	18
Q530 0.1	D20	GAPDH	2	18.28
Q530 0.1	D21	GAPDH	3	17.83
Q530 0.2	D22	GAPDH	1	17.95
Q530 0.2	D23	GAPDH	2	18.35
Q530 0.2	D24	GAPDH	3	17.98

## Sheet: Sheet2
Sample	Well	Gene	BioRep	Cq						Exp CoV-2	Exp GAP	CoV2/GAPDH
Ct Ni	A1	CoV	1	29.85	Ct Ni	A13	GAPDH	1	17.51	1.03337e-09	5.35753e-06	0.000192881
Ct Ni	A2	CoV	2	31.62	Ct Ni	A14	GAPDH	2	17.91	3.02992e-10	4.06025e-06	7.4624e-05
Ct Ni	A3	CoV	3	31.6	Ct Ni	A15	GAPDH	3	17.72	3.07222e-10	4.63179e-06	6.6329e-05
Ct 0.05	A4	CoV	1	18.57	Ct 0.05	A16	GAPDH	1	17.73	2.56964e-06	4.59979e-06	0.558644
Ct 0.05	A5	CoV	2	17.8	Ct 0.05	A17	GAPDH	2	17.67	4.38194e-06	4.79513e-06	0.913831
Ct 0.05	A6	CoV	3	17.77	Ct 0.05	A18	GAPDH	3	17.22	4.47401e-06	6.55033e-06	0.68302
Ct 0.1	A7	CoV	1	17.59	Ct 0.1	A19	GAPDH	1	17.67	5.06853e-06	4.79513e-06	1.05702
Ct 0.1	A8	CoV	2	17.01	Ct 0.1	A20	GAPDH	2	17.78	7.57669e-06	4.44311e-06	1.70527
Ct 0.1	A9	CoV	3	17.56	Ct 0.1	A21	GAPDH	3	17.63	5.17503e-06	4.92993e-06	1.04972
Ct 0.2	A10	CoV	1	15.54	Ct 0.2	A22	GAPDH	1	17.22	2.09891e-05	6.55033e-06	3.20428
Ct 0.2	A11	CoV	2	15.74	Ct 0.2	A23	GAPDH	2	17.33	1.82721e-05	6.06946e-06	3.01049
Ct 0.2	A12	CoV	3	15.46	Ct 0.2	A24	GAPDH	3	17.31	2.21859e-05	6.15419e-06	3.605
KO Ni	B1	CoV	1	31.61	KO Ni	B13	GAPDH	1	18.52	3.051e-10	2.66026e-06	0.000114688
KO Ni	B2	CoV	2	31.58	KO Ni	B14	GAPDH	2	18.06	3.11511e-10	3.6593e-06	8.51284e-05
KO Ni	B3	CoV	3	31.54	KO Ni	B15	GAPDH	3	18.31	3.20268e-10	3.07709e-06	0.000104081
KO 0.05	B4	CoV	1	24.54	KO 0.05	B16	GAPDH	1	18.82	4.09943e-08	2.1608e-06	0.0189718
KO 0.05	B5	CoV	2	25.7	KO 0.05	B17	GAPDH	2	18.45	1.83455e-08	2.79252e-06	0.0065695
KO 0.05	B6	CoV	3	26.67	KO 0.05	B18	GAPDH	3	18.73	9.36548e-09	2.2999e-06	0.00407213
KO 0.1	B7	CoV	1	17.77	KO 0.1	B19	GAPDH	1	16.86	4.47401e-06	8.40687e-06	0.532185
KO 0.1	B8	CoV	2	18.91	KO 0.1	B20	GAPDH	2	16.81	2.03013e-06	8.70334e-06	0.233258
KO 0.1	B9	CoV	3	17.73	KO 0.1	B21	GAPDH	3	16.94	4.59979e-06	7.95338e-06	0.578344
KO 0.2	B10	CoV	1	17.34	KO 0.2	B22	GAPDH	1	16.42	6.02754e-06	1.14048e-05	0.528509
KO 0.2	B11	CoV	2	17.64	KO 0.2	B23	GAPDH	2	16.94	4.89588e-06	7.95338e-06	0.615572
KO 0.2	B12	CoV	3	17.47	KO 0.2	B24	GAPDH	3	17.51	5.50815e-06	5.35753e-06	1.02811
wt Ni	C1	CoV	1	29.88	wt Ni	C13	GAPDH	1	17.64	1.0121e-09	4.89588e-06	0.000206725
wt Ni	C2	CoV	2	30.01	wt Ni	C14	GAPDH	2	17.86	9.24889e-10	4.20343e-06	0.000220032
wt Ni	C3	CoV	3	30.17	wt Ni	C15	GAPDH	3	17.66	8.27799e-10	4.82848e-06	0.000171441
wt 0.05	C4	CoV	1	19.34	wt 0.05	C16	GAPDH	1	17.96	1.50688e-06	3.92194e-06	0.384219
wt 0.05	C5	CoV	2	18.8	wt 0.05	C17	GAPDH	2	17.69	2.19097e-06	4.72911e-06	0.463294
wt 0.05	C6	CoV	3	18.68	wt 0.05	C18	GAPDH	3	17.59	2.381e-06	5.06853e-06	0.469761
wt 0.1	C7	CoV	1	17.24	wt 0.1	C19	GAPDH	1	17.45	6.46015e-06	5.58504e-06	1.15669
wt 0.1	C8	CoV	2	17.23	wt 0.1	C20	GAPDH	2	17.79	6.50509e-06	4.41242e-06	1.47427
wt 0.1	C9	CoV	3	17.33	wt 0.1	C21	GAPDH	3	17.34	6.06946e-06	6.02754e-06	1.00696
wt 0.2	C10	CoV	1	17.37	wt 0.2	C22	GAPDH	1	17.6	5.90349e-06	5.03352e-06	1.17283
wt 0.2	C11	CoV	2	17.54	wt 0.2	C23	GAPDH	2	17.72	5.24728e-06	4.63179e-06	1.13288
wt 0.2	C12	CoV	3	16.13	wt 0.2	C24	GAPDH	3	17.35	1.3944e-05	5.9859e-06	2.32947
Q530 Ni	D1	CoV	1	30.07	Q530 Ni	D13	GAPDH	1	18.02	8.87213e-10	3.76218e-06	0.000235824
Q530 Ni	D2	CoV	2	30.43	Q530 Ni	D14	GAPDH	2	17.45	6.91285e-10	5.58504e-06	0.000123774
Q530 Ni	D3	CoV	3	30.43	Q530 Ni	D15	GAPDH	3	17.25	6.91285e-10	6.41553e-06	0.000107752
Q530 0.05	D4	CoV	1	18.59	Q530 0.05	D16	GAPDH	1	17.85	2.53427e-06	4.23267e-06	0.598739
Q530 0.05	D5	CoV	2	17.12	Q530 0.05	D17	GAPDH	2	17.26	7.02047e-06	6.37122e-06	1.10191
Q530 0.05	D6	CoV	3	18.57	Q530 0.05	D18	GAPDH	3	17.23	2.56964e-06	6.50509e-06	0.395021
Q530 0.1	D7	CoV	1	16.55	Q530 0.1	D19	GAPDH	1	18	1.04221e-05	3.8147e-06	2.73208
Q530 0.1	D8	CoV	2	17.04	Q530 0.1	D20	GAPDH	2	18.28	7.42077e-06	3.14175e-06	2.36199
Q530 0.1	D9	CoV	3	16.81	Q530 0.1	D21	GAPDH	3	17.83	8.70334e-06	4.29176e-06	2.02792
Q530 0.2	D10	CoV	1	16.43	Q530 0.2	D22	GAPDH	1	17.95	1.1326e-05	3.94922e-06	2.86791
Q530 0.2	D11	CoV	2	16.61	Q530 0.2	D23	GAPDH	2	18.35	9.99751e-06	2.99295e-06	3.34035
Q530 0.2	D12	CoV	3	15.97	Q530 0.2	D24	GAPDH	3	17.98	1.55794e-05	3.86795e-06	4.02782
