# Supplementary material for: Proteolytic cleavage and inactivation of the TRMT1 tRNA modification enzyme by SARS-CoV-2 main protease
Source: eLife. 2024 May 30;12:RP90316. doi: 10.7554/eLife.90316 (PMC11139479; doi:10.7554/eLife.90316)
Supplement: Figure 8—source data 1. [file elife-90316-fig8-data1.xlsx]

## Sheet: Data Infectivity 6 wells
	6 well format		SN titer
	TCID50		FFU per ml of supernatant
			FFU/mL	SD
	MOI 0.1	Ctl	218	6.62
		TRMT1-KO	47	1.5
		KO+TRMT1-wt	169	5.84
		KO + TRMT1 Q530N	169	5.84
	MOI 0.2	Ctl	607	33
		TRMT1-KO	470	19.3
		KO+TRMT1-wt	282	1.18
		KO + TRMT1 Q530N	1001	18.5
	(n=3)
	6 well format
	Ultracentrifugation		Copies per ml of supernatant
	RTqPCR
			Copie Moy	Copies/mL	Etype
	MOI 0.1	Ctl	22833.3	19408.3	896.289
		TRMT1-KO	9350	7947.5	441.928
		KO+TRMT1-wt	10933.3	9293.33	57.735
		KO + TRMT1 Q530N	27966.7	23771.7	776.745
	MOI 0.2	Ctl	68700	58395	3659.23
		TRMT1-KO	57100	48535	1044.03
		KO+TRMT1-wt	19233.3	16348.3	115.47
		KO + TRMT1 Q530N	9423.33	8009.83	100.167
	(n=3)
	Infectivity calculation
			FFU/mL	SD	Copies/mL	Etype	FFU/ 100 copy	etype
	MOI 0.1	Ctl	218	6.62	19408.3	896.289	1.12323	0.00738601
		TRMT1-KO	47	1.5	7947.5	441.928	0.591381	0.00339422
		KO+TRMT1-wt	169	5.84	9293.33	57.735	1.81851	0.101152
		KO + TRMT1 Q530N	169	5.84	23771.7	776.745	0.71093	0.00751855
	MOI 0.2	Ctl	607	33	58395	3659.23	1.03947	0.00901828
		TRMT1-KO	470	19.3	48535	1044.03	0.968373	0.018486
		KO+TRMT1-wt	282	1.18	16348.3	115.47	1.72495	0.0102191
		KO + TRMT1 Q530N	1001	18.5	8009.83	100.167	12.4971	0.184692

## Sheet: Raw data RTqPCR ultra
Experiment: M364 96w&UltraGamCov 10Aout22 Selected Filter: SYBR Green I / HRM Dye (465-510)
Include	Color	Pos	Name	Cp	Concentration	Standard	Status
True	255	E1	C2	19.57	21800	0	Ctl	MOI 0.1
True	255	E2	C2	19.47	23300	0	Ctl	MOI 0.1				Copie Moy	Copies/mL	Etype
True	255	E3	C2	19.47	23400	0	Ctl	MOI 0.1		MOI 0.1	Ctl	22833.3	19408.3	896.289
True	255	E4	C3	17.99	65200	0	Ctl	MOI 0.2			TRMT1-KO	9350	7947.5	441.928
True	255	E5	C3	17.92	68400	0	Ctl	MOI 0.2			KO + TRMT1-wt	10933.3	9293.33	57.735
True	255	E6	C3	17.83	72500	0	Ctl	MOI 0.2			KO + TRMT1 Q530N	27966.7	23771.7	776.745
True	255	E7	K2	20.87	8870	0	TRMT1-KO	MOI 0.1		MOI 0.2	Ctl	68700	58395	3659.23
True	255	E8	K2	20.78	9440	0	TRMT1-KO	MOI 0.1			TRMT1-KO	57100	48535	1044.03
True	255	E9	K2	20.73	9740	0	TRMT1-KO	MOI 0.1			KO + TRMT1-wt	19233.3	16348.3	115.47
True	255	E10	K3	18.21	55900	0	TRMT1-KO	MOI 0.2			KO + TRMT1 Q530N	9423.33	8009.83	100.167
True	255	E11	K3	18.17	57600	0	TRMT1-KO	MOI 0.2
True	255	E12	K3	18.16	57800	0	TRMT1-KO	MOI 0.2
True	255	E13	W2	20.55	11000	0	KO + TRMT1-wt	MOI 0.1
True	255	E14	W2	20.57	10900	0	KO + TRMT1-wt	MOI 0.1
True	255	E15	W2	20.57	10900	0	KO + TRMT1-wt	MOI 0.1
True	255	E16	W3	19.75	19300	0	KO + TRMT1-wt	MOI 0.2
True	255	E17	W3	19.76	19100	0	KO + TRMT1-wt	MOI 0.2
True	255	E18	W3	19.75	19300	0	KO + TRMT1-wt	MOI 0.2
True	255	E19	Q2	19.2	28200	0	KO + TRMT1 Q530N	MOI 0.1
True	255	E20	Q2	19.18	28600	0	KO + TRMT1 Q530N	MOI 0.1
True	255	E21	Q2	19.26	27100	0	KO + TRMT1 Q530N	MOI 0.1
True	255	E22	Q3	20.77	9500	0	KO + TRMT1 Q530N	MOI 0.2
True	255	E23	Q3	20.8	9310	0	KO + TRMT1 Q530N	MOI 0.2
True	255	E24	Q3	20.77	9460	0	KO + TRMT1 Q530N	MOI 0.2
True	255	G1	water	33.81	0.0883	0	standard Curve
True	255	G2	water	32.12	0.638	0	standard Curve
True	255	G3	water	33.49	0.129	0	standard Curve
True	128	G4	10^7	10.67	10300000	10000000	standard Curve
True	128	G5	10^7	10.64	10600000	10000000	standard Curve
True	128	G6	10^7	10.49	11800000	10000000	standard Curve
True	128	G7	10^6	14.09	970000	1000000	standard Curve
True	128	G8	10^6	14.16	923000	1000000	standard Curve
True	128	G9	10^6	14.01	1020000	1000000	standard Curve
True	128	G10	10^5	17.58	86200	100000	standard Curve
True	128	G11	10^5	17.53	89200	100000	standard Curve
True	128	G12	10^5	17.55	88500	100000	standard Curve
True	128	G13	10^4	20.55	11100	10000	standard Curve
True	128	G14	10^4	20.61	10600	10000	standard Curve
True	128	G15	10^4	19.55	22100	10000	standard Curve
True	128	G16	10^3	24.01	1010	1000	standard Curve
True	128	G17	10^3	24.02	997	1000	standard Curve
True	128	G18	10^3	24.09	950	1000	standard Curve
True	128	G19	10^2	26.71	128	100	standard Curve
True	128	G20	10^2	26.95	105	100	standard Curve
True	128	G21	10^2	27.24	81.8	100	standard Curve
True	128	G22	10^1	29.52	9.87	10	standard Curve
True	128	G23	10^1	29.53	9.76	10	standard Curve
True	128	G24	10^1	29.18	13.7	10	standard Curve
